# Supplementary material for: Ampelisca eschrichtii Krøyer, 1842 (Ampeliscidae) of the Sakhalin Shelf in the Okhotsk Sea starve in summer and feast in winter
Source: PeerJ. 2018 Jun 22;6:e4841. doi: 10.7717/peerj.4841 (PMC6016533; doi:10.7717/peerj.4841)
Supplement: Supplemental Information 2 — Species, Site, Sample, Region, Body Length (mm), Weight (g), Sex, Brood development Index, Collection Jul + Sep 2015, Embryo development Notes, Date, Expected Brood Size (Exp. BS) [file peerj-06-4841-s004.xlsx]

## Sheet: Sheet1
Durkina et al PeerJ Figure 7 Data 20171223
				5	EmbryoDiameter	Diameter				Embyro Diameter	3.8 mm Juv
Source	Species	Average Body Length (mm)	Average Brood Count	Embryo Diameter (mm)	2015 ED	A. e. oocytes	F0 VO	FII VO	FIV VO	2002+2011	Wt Est. ED	Coll. Date	Fem. Dev.	Development	Condition
Saint Marie 1991	Acanthohaustorius millsi	5.1	7.8
Saint Marie 1991	Acanthohaustorius millsi	3.8	4.8	0.78
Saint Marie 1991	Acanthohaustorius sp.	3.9	5.2
Saint Marie 1991	Allomelita pellucida	3	4	0.48
Saint Marie 1991	Ampelisca abdita	6.6	26	0.43
Saint Marie 1991	Ampelisca abdita	5.3	13.7	0.39
Saint Marie 1991	Ampelisca abdita	4.9	22
Saint Marie 1991	Ampelisca araucana	4.8	4.7	0.45
Saint Marie 1991	Ampelisca armoricana	10.8	42.4
Saint Marie 1991	Ampelisca brevicornis	13.7	23
Saint Marie 1991	Ampelisca brevicornis	13.6	45.9
Saint Marie 1991	Ampelisca brevicornis	12.8	37.1
Saint Marie 1991	Ampelisca brevicornis	11.6	29.5	0.48
Saint Marie 1991	Ampelisca brevicornis	11.5	32.6
Saint Marie 1991	Ampelisca diadema	9	12.3	0.49
Saint Marie 1991	Ampelisca macrocephala	16.8	60	0.68
Saint Marie 1991	Ampelisca sarsi	6.7	15.6
Saint Marie 1991	Ampelisca spinipes	16.5	52.5
Saint Marie 1991	Ampelisca tenuicornis	8.8	23.6	0.37
Saint Marie 1991	Ampelisca tenuicornis	8.7	37.8
Saint Marie 1991	Ampelisca tenuicornis	7.8	26.1
Saint Marie 1991	Ampelisca typica	8.6	20.4
Saint Marie 1991	Ampelisca vadorum	9.5	32.1	0.56
Saint Marie 1991	Ampelisca vadorum	6	9.1	0.51
Saint Marie 1991	Ampelisca verrilli	10.6	14.6
Saint Marie 1991	Amphiporeia lawrenciana	10	14.6	0.83
Saint Marie 1991	Amphiporeia lawrenciana	8.5	25.6	0.61
Saint Marie 1991	Amphiporeia virginiana	5.5	6	0.27
Saint Marie 1991	Amphiporeia virginiana	5.1	8.9
Saint Marie 1991	Ampithoe lacertosa	15.1		0.46
Saint Marie 1991	Ampithoe longimana	5.8		0.38
Saint Marie 1991	Ampithoe ramondi	8		0.31
Saint Marie 1991	Ampithoe rubricata	16.2
Saint Marie 1991	Ampithoe rubricata	15.3
Saint Marie 1991	Ampithoe valida	9.7		0.42
Saint Marie 1991	Anonyx nugax	42	630	1.3
Saint Marie 1991	Anonyx sarsi	22.4	105.8	1.02
Saint Marie 1991	Anonyx sarsi	18.6	84	1.01
Saint Marie 1991	Anonyx sp.	30	259
Saint Marie 1991	Anonyx spp.	17.6	68
Saint Marie 1991	Atyloella magellanica	18.8	114.3	0.67
Saint Marie 1991	Atylus guttatus	5.5	26	0.4
Saint Marie 1991	Austrochiltonia australis	6	46.5
Saint Marie 1991	Austrochiltonia subtenuis	4	22.1
Saint Marie 1991	Bathyporeia elegans	3.5	3.5
Saint Marie 1991	Bathyporeia guilliamsoniana	7.2	22
Saint Marie 1991	Bathyporeia nana	2.4	2.4
Saint Marie 1991	Bathyporeia pelagica	5.6	7.5
Saint Marie 1991	Bathyporeia pelagica	5.1	6.4	0.42
Saint Marie 1991	Bathyporeia pelagica	4.1	3.7
Saint Marie 1991	Bathyporeia pilosa	5.1	5
Saint Marie 1991	Bathyporeia pilosa	4.4	6.9	0.44
Saint Marie 1991	Bathyporeia sarsi	5.5	9
Saint Marie 1991	Bovalia gigantea	45.2	108	1.34
Saint Marie 1991	Bruzelia tuberculata	16	30	0.85
Saint Marie 1991	Bumeralius buchalius	5	4.8
Saint Marie 1991	Calliopius laevisculus	12	83.3
Saint Marie 1991	Calliopius laevisculus	10.5	65.2	0.58
Saint Marie 1991	Calliopius laevisculus	9.8	85
Saint Marie 1991	Calliopius laevisculus	8	48.5	0.45
Saint Marie 1991	Casco bigelowi	19.2	50.2	0.62
Saint Marie 1991	Casco bigelowi	15	40	0.62
Saint Marie 1991	Cheirimedon femoratus	13	68.9	0.67
Saint Marie 1991	Chelura terebrans	4		0.45
Saint Marie 1991	Corophium acherusicum	4.1
Saint Marie 1991	Corophium acherusicum	3		0.31
Saint Marie 1991	Corophium arenarium	5.1
Saint Marie 1991	Corophium bonnellii	3.1		0.36
Saint Marie 1991	Corophium insidiosum	3.8		0.36
Saint Marie 1991	Corophium insidiosum	3.2		0.28
Saint Marie 1991	Corophium insidiosum	3.1		0.28
Saint Marie 1991	Corophium volutator	7.8
Saint Marie 1991	Corophium volutator	7.2
Saint Marie 1991	Corophium volutator	6.4
Saint Marie 1991	Coropium sextonae	4.3
Saint Marie 1991	Crangonyx gracilis	8.1	45.7
Saint Marie 1991	Crangonyx gracilis	7.8	33
Saint Marie 1991	Crangonyx richmondensis	13.8	43	0.54
Saint Marie 1991	Crangonyx richmondensis	13	23.3	0.3
Saint Marie 1991	Crangonyx rivularis	6
Saint Marie 1991	Cymadusa compta	5.8		0.37
Saint Marie 1991	Cymadusa filosa	8.5	29.5	0.39
Saint Marie 1991	Dexamine spinosa	6	25
Saint Marie 1991	Dierboa furcipes	18	59
Saint Marie 1991	Diogidias littoralis	3.9	2.7	0.35
Saint Marie 1991	Dulichia spinosissima	13.5	227	0.52
Saint Marie 1991	Elasmopus levis	7.1	22.3
Saint Marie 1991	Elasmopus levis	4.3	4.7	0.4
Saint Marie 1991	Eohaustorius brevicuspis	3.9	6.9
Saint Marie 1991	Eohaustorius estuarius	3.7	6.5
Saint Marie 1991	Eohaustorius sencillus	2.8	6.3	0.39
Saint Marie 1991	Eohaustorius washingtonianus	4.6	11.9
Saint Marie 1991	Epimeria loricata	26.3	16
Saint Marie 1991	Epimeria loricata	25	20.5
Saint Marie 1991	Epimeria monodon	24.5	55.5	1.27
Saint Marie 1991	Erichtonius brasiliensis	5	9.4
Saint Marie 1991	Euonyx chelatus	8.3	9	0.68
Saint Marie 1991	Eurymera monticulosa	24.3	96.7	0.75
Saint Marie 1991	Exoediceroides maculosus	5.1	9.4
Saint Marie 1991	Exoediceros fossor	5.7	9.6
Saint Marie 1991	Gammaracanthus loricatus	46	599.2	0.85
Saint Marie 1991	Gammaracanthus loricatus	40	327
Saint Marie 1991	Gammarelus angulosus	11.5	21.5	0.65
Saint Marie 1991	Gammarelus homari	25.7	127	1
Saint Marie 1991	Gammaropsis inaequistylis	5.2	27.5	0.23
Saint Marie 1991	Gammaropsis longicornis	3.3	7.5
Saint Marie 1991	Gammaropsis megalops	8.8	10.5	0.45
Saint Marie 1991	Gammarus chevreuxi	7	30
Saint Marie 1991	Gammarus crinicornis	9.5	33.2	0.44
Saint Marie 1991	Gammarus duebeni	14.5	36.5
Saint Marie 1991	Gammarus duebeni	14	25.4	0.56
Saint Marie 1991	Gammarus duebeni	13.5	40.5
Saint Marie 1991	Gammarus duebeni	11.2	24	0.61
Saint Marie 1991	Gammarus duebeni	10.9	19.8	0.65
Saint Marie 1991	Gammarus duebeni	10.5	17.9
Saint Marie 1991	Gammarus fasciatus	10.3	16.6	0.46
Saint Marie 1991	Gammarus fasciatus	9.5	29.3
Saint Marie 1991	Gammarus fasciatus	8.7	22.3
Saint Marie 1991	Gammarus finmarchicus	13.5	21.5	0.5
Saint Marie 1991	Gammarus inaequicauda	9.5	36
Saint Marie 1991	Gammarus lacustris	13.4	24.3
Saint Marie 1991	Gammarus lacustris	11.5	21.8
Saint Marie 1991	Gammarus lacustris	10	17.5
Saint Marie 1991	Gammarus lawrencianus	7	19.2	0.41
Saint Marie 1991	Gammarus lawrencianus	7	21.8	0.41
Saint Marie 1991	Gammarus locusta	23.9	130
Saint Marie 1991	Gammarus locusta	19.6	104.5
Saint Marie 1991	Gammarus locusta	10.8	62.1	0.43
Saint Marie 1991	Gammarus locusta	10	49
Saint Marie 1991	Gammarus marinus	14.2	23.3
Saint Marie 1991	Gammarus marinus	14	16.4
Saint Marie 1991	Gammarus mucronatus	9.6	34.6	0.42
Saint Marie 1991	Gammarus mucronatus	8.1	27.4
Saint Marie 1991	Gammarus mucronatus	8	35.7	0.43
Saint Marie 1991	Gammarus mucronatus	6	14	0.36
Saint Marie 1991	Gammarus mucronatus	5.8	21.4	0.28
Saint Marie 1991	Gammarus mucronatus	5.5	16.8	0.43
Saint Marie 1991	Gammarus obtusatus	11.5	13.5	0.65
Saint Marie 1991	Gammarus obtusatus	11	9	0.55
Saint Marie 1991	Gammarus obtusatus	10.5	7	0.61
Saint Marie 1991	Gammarus oceanicus	15.5	37.4	0.55
Saint Marie 1991	Gammarus oceanicus	15.3	77.2	0.55
Saint Marie 1991	Gammarus olivii	6.5	23
Saint Marie 1991	Gammarus palustris	7.5	12
Saint Marie 1991	Gammarus palustris	7.2	30.5
Saint Marie 1991	Gammarus palustris	6.5	9.2	0.41
Saint Marie 1991	Gammarus pseudolimnaeus	11.5	39
Saint Marie 1991	Gammarus pulex	8.9	16
Saint Marie 1991	Gammarus salinus	12	76.5
Saint Marie 1991	Gammarus salinus	10.5	33	0.31
Saint Marie 1991	Gammarus setosus	18	36.6	0.69
Saint Marie 1991	Gammarus setosus	15	24.8	0.69
Saint Marie 1991	Gammarus stoerensis	6.7	26.9
Saint Marie 1991	Gammarus stoerensis	6	12	0.44
Saint Marie 1991	Gammarus subtypicus	11	21.8	0.37
Saint Marie 1991	Gammarus tigrinus	10	30.7	0.46
Saint Marie 1991	Gammarus tigrinus	6.5	28.7
Saint Marie 1991	Gammarus troglophilus	12.8	12
Saint Marie 1991	Gammarus wilkitzkii	26.5	159.1	0.73
Saint Marie 1991	Gammarus zaddachi	10.6	27.8	0.53
Saint Marie 1991	Gammarus zaddachi	9.5	47.5
Saint Marie 1991	Gitanopsis squamosa	3.6	5.9	0.4
Saint Marie 1991	Grandidierella bonnieroides	5.4	28.9
Saint Marie 1991	Haploops fundiensis	7	5	0.43
Saint Marie 1991	Haploops tenuis	8	35	0.59
Saint Marie 1991	Haploops tubicola	10.5	45	0.75
Saint Marie 1991	Haustorius arenarius	9.5	11.8
Saint Marie 1991	Haustorius canadensis	6.8	7.9
Saint Marie 1991	Haustorius dytiscus	4	4
Saint Marie 1991	Haustorius sp.	6.4	5.6
Saint Marie 1991	Hippomedon kergueleni	11.5	8.8	0.74
Saint Marie 1991	Hippomedon propinquus	10	10	0.55
Saint Marie 1991	Hippomedon propinquus	9.7	8.8	0.58
Saint Marie 1991	Hippomedon propinquus	8.8	6.5	0.58
Saint Marie 1991	Hippomedon whero	5.3	3.4	0.39
Saint Marie 1991	Hirondellea gigas	40	97.2	0.72
Saint Marie 1991	Hyale barbicornis	7.5	13.5
Saint Marie 1991	Hyale nilssoni	7.5	23.8
Saint Marie 1991	Hyale nilssoni	6.2	20.7
Saint Marie 1991	Hyale prevosti	6.9	16
Saint Marie 1991	Hyale schmidti	4	5.7
Saint Marie 1991	Hyalella azteca	6.7	17	0.28
Saint Marie 1991	Hyalella azteca	5.9	18	0.29
Saint Marie 1991	Hyalella azteca	4.3	8	0.35
Saint Marie 1991	Hyalella knickerbockeri	5.5	17.6
Saint Marie 1991	Ischyrocerus anquipes	6.8	75
Saint Marie 1991	Ischyrocerus anquipes	4.9	34.5
Saint Marie 1991	Jassa falcata	6.7	9.4
Saint Marie 1991	Jassa falcata	4.6	25.6	0.29
Saint Marie 1991	Jassa marmorata	6.2	40.3
Saint Marie 1991	Jassa marmorata	4.9	19.2
Saint Marie 1991	Lafystius morhuanus	5.7	7.3
Saint Marie 1991	Lembos websteri	4.7	8	0.39
Saint Marie 1991	Lepidepecreum cingulatum	6.6	10.8	0.44
Saint Marie 1991	Leptocheirus pilosus	3.5	11
Saint Marie 1991	Leptocheirus pinguis	14.1	49.8	0.47
Saint Marie 1991	Leucothoe spinicarpa	10.7	20.7	0.66
Saint Marie 1991	Liouvillea oculata	15.5	39
Saint Marie 1991	Melita appendiculata	3.8	5.1	0.36
Saint Marie 1991	Melita celericula	3.3	3.4	0.32
Saint Marie 1991	Melita formosa	24.2	54	0.7
Saint Marie 1991	Melita nitida	6.9	30
Saint Marie 1991	Melita nitida	5.8	17.7	0.3
Saint Marie 1991	Melita palmata	10.5	8.8	0.45
Saint Marie 1991	Melita zeylanica	5	16.5
Saint Marie 1991	Metaleptamphopus pectinatus	6	9.3	0.43
Saint Marie 1991	Metambasia faeroensis	5.5	2	0.4
Saint Marie 1991	Metopa groenlandica	5	5
Saint Marie 1991	Metopa tuberculata	2.9	2
Saint Marie 1991	Metopelloides micropalpa	4.8	14.2	0.49
Saint Marie 1991	Microdeutopus gryllotalpa	6.3	21
Saint Marie 1991	Monoculodes edwarsi	6	28.4	0.28
Saint Marie 1991	Neohaustorius biarticulatus	5	7
Saint Marie 1991	Neohaustorius schmitzi	4.5	4.8	0.45
Saint Marie 1991	Neohaustorius schmitzi	3.2	3.5
Saint Marie 1991	Niphargus aquilex	4.9	2.9
Saint Marie 1991	Oediceros saginatus	16.8	148.8	0.94
Saint Marie 1991	Onisimus litoralis	16.9	44.2	0.88
Saint Marie 1991	Opisa tridentata	7	6.6
Saint Marie 1991	Orchestia gammarelus	15	19	0.73
Saint Marie 1991	Orchestia mediterranea	20	36	0.65
Saint Marie 1991	Orchestia platensis	9.5	24	0.58
Saint Marie 1991	Orchestia platensis	9.5	18
Saint Marie 1991	Orchestia platensis	8.4	13.5	0.62
Saint Marie 1991	Orchestia roffensis	8	5	0.56
Saint Marie 1991	Orchomene gerulicorbis	11.6	35
Saint Marie 1991	Orchomene plebs	17.8	28.9	0.83
Saint Marie 1991	Orchomene rossi	41	37.1
Saint Marie 1991	Orchomene rotundifrons	11	15
Saint Marie 1991	Orchomenella minuta	6.4	14.7	0.52
Saint Marie 1991	Orchomenella minuta	6.2	22
Saint Marie 1991	Orchomenella minuta	5.3	9
Saint Marie 1991	Orchomenella minuta	5.1	16.5	0.48
Saint Marie 1991	Orchomenella pinguis	7.8	41.5	0.51
Saint Marie 1991	Orchomenella pinguis	5.3	11
Saint Marie 1991	Orhestia cavimana	16	18	0.62
Saint Marie 1991	Orhestia cavimana	13.5	14.6
Saint Marie 1991	Pallasea quadrispinosa	12	57.5
Saint Marie 1991	Pallasea quadrispinosa	11	28.6	0.58
Saint Marie 1991	Paraharpinia rotundifrons	6.5	14.3	0.54
Saint Marie 1991	Parahaustorius longimerus	6.6	5.3
Saint Marie 1991	Parahaustorius longimerus	6.3	7.8
Saint Marie 1991	Paramoera hurleyi	6.8	11
Saint Marie 1991	Paramoera walkeri	16.8	200
Saint Marie 1991	Paramoera walkeri	14.6	126
Saint Marie 1991	Paramoera walkeri	13.8	106.5	0.55
Saint Marie 1991	Paramphithoe cuspidata	20.7	38
Saint Marie 1991	Parawaldeckia stephenseni	4.6	12
Saint Marie 1991	Parhyalella basrensis	6.3	15.3	0.39
Saint Marie 1991	Parhyalella pietschmanni	6.5	12.9	0.39
Saint Marie 1991	Patuki roperi	9	6.7	0.48
Saint Marie 1991	Photis reinhardi	5	14	0.5
Saint Marie 1991	Pontocrates altamarinus	4	4.8
Saint Marie 1991	Pontocrates arenarius	3.1	3.1
Saint Marie 1991	Pontogeneia antarctica	17.5	49	0.65
Saint Marie 1991	Pontogeneia inermis	9.1	56.3	0.57
Saint Marie 1991	Pontogeneia simples	15	23
Saint Marie 1991	Pontogeniella brevicornis	18.1	65.8	0.67
Saint Marie 1991	Pontoporeia affinis	8.1	16.5	0.53
Saint Marie 1991	Pontoporeia affinis	7.5	24
Saint Marie 1991	Pontoporeia femorata	12.5	57.6	0.41
Saint Marie 1991	Pontoporeia femorata	11.5	71.5
Saint Marie 1991	Pontoporeia femorata	11	63.5	0.45
Saint Marie 1991	Pontoporeia hoyi	7	14.2
Saint Marie 1991	Pontoporeia hoyi	6.5	17.8
Saint Marie 1991	Pontoporeia sp.	11	48.3	0.61
Saint Marie 1991	Probolisca ovata	2.9	4.5
Saint Marie 1991	Proboscinotus loquax	8.4	20	0.5
Saint Marie 1991	Protebbingia gracilis	7.9	24.9	0.44
Saint Marie 1991	Protohaustorius deichmannae	4.7	5.7
Saint Marie 1991	Protohaustorius deichmannae	3.8	3.2
Saint Marie 1991	Protophoxus australis	8.6	19.3	0.45
Saint Marie 1991	Psammonyx nobilis	12.5	21.5
Saint Marie 1991	Psammonyx terranovae	15.2	17.7	1.07
Saint Marie 1991	Psammonyx terranovae	13.8	18.6	1.1
Saint Marie 1991	Pseudomoera gabrieli	9.5	41
Saint Marie 1991	Pseudorchomene coatsi	14	62
Saint Marie 1991	Quadrivisio lutzi	4.5	3	0.35
Saint Marie 1991	Rhachotropis aculeata	38	236.5
Saint Marie 1991	Rhachotropis aculeata	27.7	62.5
Saint Marie 1991	Rhachotropis oculata	12.1	24
Saint Marie 1991	Rhepoxynius abronius	3.6	9.3
Saint Marie 1991	Rhepoxynius abronius	2.8	4	0.41
Saint Marie 1991	Rhepoxynius fatigans	3.8	9.1	0.42
Saint Marie 1991	Rudilemboides naglei	3.2	5.8
Saint Marie 1991	Seba dubia	3.5	2.5
Saint Marie 1991	Seborgia minima	0.9	1	0.25
Saint Marie 1991	Stegocephalina ingolfi	9	15	0.6
Saint Marie 1991	Stegocephalus inflatus	31.3	65.5
Saint Marie 1991	Stegocephalus inflatus	30	32.3	1.66
Saint Marie 1991	Stegocephalus inflatus	21.5	23.5	1.37
Saint Marie 1991	Stenopleura atlantica	5.8	7
Saint Marie 1991	Talitrus saltator	12.6	13	0.85
Saint Marie 1991	Talorchestia margaritae	8.8	7.2
Saint Marie 1991	Tmetonyx sp.	15.1	12.3	1.32
Saint Marie 1991	Uhlorchestia sparinophila	7.8	5.5
Saint Marie 1991	Uhlorchestia uhleri	9	6
Saint Marie 1991	Urohaustorius metungi	3.9	10.1
Saint Marie 1991	Urothoe brevicornis	6.4	23
Saint Marie 1991	Westwoodilla caecula	6	20
Demchenko2002	Ampelisca eschrichtii	25								1.15		2002		Embryos
Demchenko2011	Ampelisca eschrichtii	26.8								1		2011		Embryos
Demchenko2011	Ampelisca eschrichtii	25.9								0.975		2011		Embryos
Demchenko2011	Ampelisca eschrichtii	28.8								1.05		2011		Embryos
Demchenko2011	Ampelisca eschrichtii	26.5								1.1		2011		Embryos
Durkina	Ampelisca eschrichtii	17				0.0885166	0.0885166					2013-10-19	F0	VO	Normal
Durkina	Ampelisca eschrichtii	17				0.122647	0.11					2013-10-19	F0	VO	Normal
Durkina	Ampelisca eschrichtii	20				0.60128	0.29					2013-10-19	F0	VO	Lysis of all VO
Durkina	Ampelisca eschrichtii	20				0.349302	0.22					2013-10-19	F0	VO	Lysis of all VO
Durkina	Ampelisca eschrichtii	20				0.232395	0.29					2013-10-19	F0	VO	Lysis of all VO
Durkina	Ampelisca eschrichtii	20				0.05821	0.53					2015-10-27	F0	VO	Lysis of all VO
Durkina	Ampelisca eschrichtii	23				0.670327	0.5					2013-10-19	F0	VO	Lysis of proportion VO
Durkina	Ampelisca eschrichtii	23				0.626981	0.52					2013-10-19	F0	VO	Lysis of proportion VO
Durkina	Ampelisca eschrichtii	23				0.2275	0.5					2013-10-19	F0	VO	Lysis of proportion VO
Durkina	Ampelisca eschrichtii	23				0.288576	0.53					2013-10-19	F0	VO	Normal
Durkina	Ampelisca eschrichtii	23				0.312328	0.33					2015-07-11	F0	VO	Lysis of all VO
Durkina	Ampelisca eschrichtii	23				0.578296	0.31					2015-07-11	F0	VO	Normal
Durkina	Ampelisca eschrichtii	23				0.569483	0.57					2015-10-27	F0	VO	Lysis of all VO
Durkina	Ampelisca eschrichtii	23				0.415642	0.57					2015-10-27	F0	VO	Normal
Durkina	Ampelisca eschrichtii	23				0.367566	0.24					2015-10-27	F0	VO	Lysis of all VO
Durkina	Ampelisca eschrichtii	26					0.52					2013-10-19	F0	VO	Lysis of proportion VO
Durkina	Ampelisca eschrichtii	32				0.27	0					2013-10-19	FIV	PVO	Regeneration
Durkina	Ampelisca eschrichtii	32				0.29	0.49					2013-10-19	F0	VO	Normal
Durkina	Ampelisca eschrichtii	23				0.232104						2013-10-19	FII	AO	Atrophy
Durkina	Ampelisca eschrichtii	23			0.73	0.235236						2013-10-19	FII	Embryos
Durkina	Ampelisca eschrichtii	23			0.787889							2015-10-27	FII	Embryos
Durkina	Ampelisca eschrichtii	23				0.344783		0.27				2013-10-19	FII	VO	Lysis of all VO
Durkina	Ampelisca eschrichtii	23				0		0.232104				2013-10-19	FII	VO	Lysis of all VO
Durkina	Ampelisca eschrichtii	23				0.293692		0.22				2013-10-19	FII	VO	Lysis of all VO
Durkina	Ampelisca eschrichtii	23				0.166664		0.13				2015-07-11	FII	VO	Lysis of proportion VO
Durkina	Ampelisca eschrichtii	23				0.403397		0.11				2015-07-11	FII	VO	Lysis of proportion VO
Durkina	Ampelisca eschrichtii	23				0.411101		0.13				2015-10-27	FII	VO	Normal
Durkina	Ampelisca eschrichtii	23				0.380195		0.13				2015-10-27	FII	VO	Normal
Durkina	Ampelisca eschrichtii	26			0.8	0.310434						2015-07-11	FII	Embryos
Durkina	Ampelisca eschrichtii	26				0.535806		0.27				2013-10-19	FII	VO	Atrophy
Durkina	Ampelisca eschrichtii	26				0.2915		0.29				2013-10-19	FII	VO	Lysis of all VO
Durkina	Ampelisca eschrichtii	26				0.30926		0.283724				2013-10-19	FII	VO	Lysis of all VO
Durkina	Ampelisca eschrichtii	26				0.283724		0.32				2013-10-19	FII	VO	Lysis of all VO
Durkina	Ampelisca eschrichtii	26				0.2915		0.14				2015-07-11	FII	VO	Lysis of proportion VO
Durkina	Ampelisca eschrichtii	26				0.161502		0.106509				2015-07-11	FII	VO	Lysis of proportion VO
Durkina	Ampelisca eschrichtii	23				0.106509			0.28			2015-07-11	FIV	VO	Lysis of all VO
Durkina	Ampelisca eschrichtii	23							0.36			2015-10-27	FIV	VO	Lysis of all VO
Durkina	Ampelisca eschrichtii	23				0.144142			0.38			2015-10-27	FIV	VO	Lysis of all VO
Durkina	Ampelisca eschrichtii	23				0.373073			0.34			2015-10-27	FIV	VO	Lysis of all VO
Durkina	Ampelisca eschrichtii	26				0.312578			0.28			2015-07-11	FIV	VO	Lysis of all VO
Durkina	Ampelisca eschrichtii	26				0			0.13			2015-10-27	FIV	VO	Lysis of all VO
Durkina	Ampelisca eschrichtii	26				0.122			0.34			2015-10-27	FIV	VO	Lysis of all VO
Durkina	Ampelisca eschrichtii	32					0.11				1.14	2013-10-19	FIV	VO	Regeneration
